# Supplementary material
Source: Springer Nature journal article supplement (https://www.springermedizin.de/resource/supplementary/12885_2010_2720_MOESM6_ESM.pdf/9461842)

**IN VIVO****IN VITRO****A. I**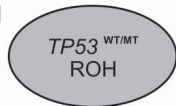

GENERATION OF DELETION

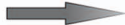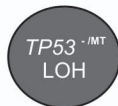**A. II**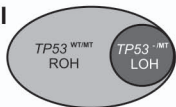

SELECTION OF SUBPOPULATION

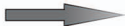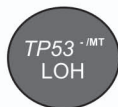**IN VIVO****IN VITRO****B. I**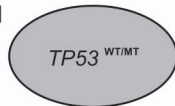

GENERATION OF THE SECOND MUTATION

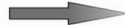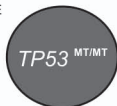**B. II**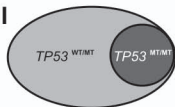

SELECTION OF SUBPOPULATION WITH 2 MUTATIONS

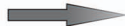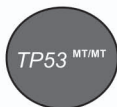

Supplement: MOESM6 [file 9461842]
